# Supplementary material for: Jarid2 is essential for the maintenance of tumor initiating cells in bladder cancer
Source: PubMed Central journal article supplement (PMC5421864; doi:10.18632/oncotarget.15522), 2017-02-20
Supplement: oncotarget-08-24483-s001.pdf [file oncotarget-08-24483-s001.pdf]

# Jarid2 is essential for the maintenance of tumor initiating cells in bladder cancer

## Supplementary Materials

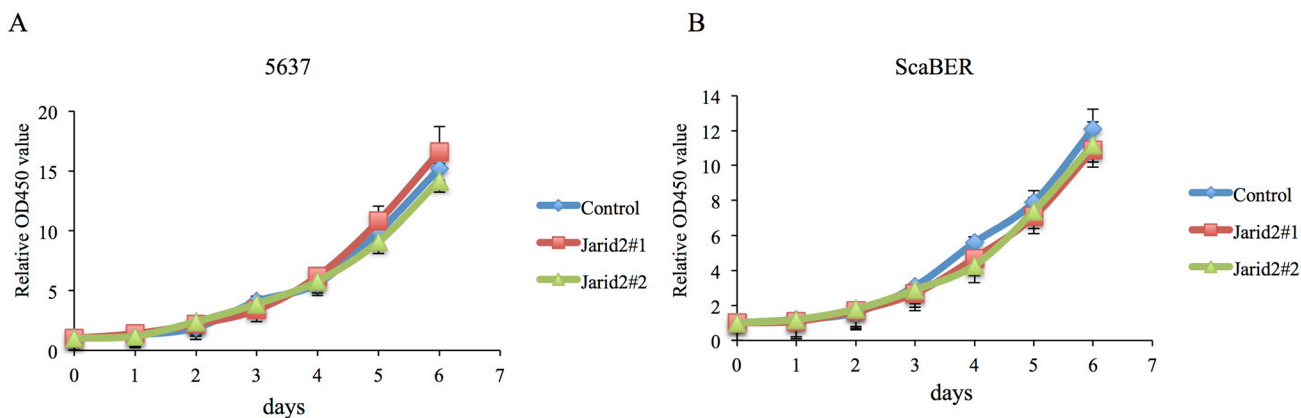

**Supplementary Figure 1: Jarid2 does not affect bladder cancer cell proliferation.** (A) Cell proliferation of 5637 cells transfected with control or Jarid2 siRNA at various time points were measured by MTT assays. (B) Cell proliferation of ScaBER cells transfected with control or Jarid2 siRNA at various time points were measured by MTT assays. Data represent the mean ( $\pm$  s.d.) of three independent experiments, each performed in triplicate.
